# Supplementary material
Source: PubMed Central journal article supplement (PMC3631445)
Supplement: NIHMS442160-supplement-1_si_001.pdf [file NIHMS442160-supplement-1_si_001.pdf]

## Supplementary material

### The potential of urinary metabolites for diagnosing multiple sclerosis

Teklab Gebregiworgis,<sup>1,†</sup> Chandirasegaran Massilamany,<sup>2,†</sup> Arunakumar Gangaplar,<sup>2,†</sup>  
Sivasubramani Thulasingham,<sup>2</sup> Venkata Kolli,<sup>1</sup> Mark T. Werth,<sup>3</sup> Eric D. Dodds,<sup>1</sup> David Steffen<sup>2</sup>,  
Jay Reddy,<sup>2,\*</sup> and Robert Powers<sup>1,\*</sup>

<sup>1</sup>*Department of Chemistry, University of Nebraska-Lincoln, Lincoln, NE, 68588-0304.*

<sup>2</sup>*School of Veterinary Medicine and Biomedical Sciences, University of Nebraska-Lincoln,  
Lincoln, NE 68588-0905*

<sup>3</sup>*Department of Chemistry, Nebraska Wesleyan University, Lincoln NE 68504*

<sup>†</sup>Equal contribution

\*Corresponding Authors

## Supplementary Discussion

For multiple sclerosis (MS), biomarkers are expected to be related to inflammation, axonal damage, demyelination, oxidative stress, and remyelination. As a result, a number of cellular and protein biomarkers have been proposed<sup>1-4</sup> that include: (i) cytokines and their receptors [interleukin (IL)-6, IL-10, IL-12], (ii) chemokines and their receptors (CCR5, CXCR3, CXCL10), (iii) antibodies [anti-myelin basic protein (a-MBP), anti-myelin oligodendrocyte glycoprotein (MOG)] (iv) antigen-processing and presentation [CD40,CD40L, heat shock protein], (v) cell-cycle and apoptosis (c-FLICE inhibitory protein, tumor necrosis factor-related apoptosis-inducing ligand), (vi) cellular subpopulations (CD4<sup>+</sup>/CD25<sup>bright</sup> T cells, NK cells, NKT cells), (vii) demyelination (QYNAD peptide), (viii) axonal/neuronal damage (NF-L, Tau protein), and (ix) remyelination (neural cell adhesion molecule, ciliary neurotrophic factor). For obvious reasons, the search for MS biomarkers has focused on the analysis of cerebrospinal fluid (CSF).<sup>5-15</sup> Unfortunately, this endeavor has proven to be extremely challenging and none of these proposed biomarkers have been successful to date.<sup>1-4</sup> Additionally, there are associated risks with obtaining CSF from patients that diminishes its value as a routine diagnostic tool.<sup>16, 17</sup> Conversely, the analysis of urine for MS biomarkers has been minimally explored, where the focus has been on the analysis of specific metabolites, neopterin, nitric oxide and p-cresol sulfate, as surrogates for interferon- $\beta$ -1 or a-MBP-like material.<sup>18-20</sup> A number of metabolites identified by our in-depth NMR analysis of urine from experimental autoimmune encephalomyelitis (EAE), EAE-treated, and healthy mice have been previously described in the literature of having an association with EAE, MS or neurological diseases. A brief summary of these prior findings is presented.

**Urea** concentrations are increased in the serum in EAE mice, which is probably a result of kidney dysfunction that is caused by EAE.<sup>21</sup> Renal problems have also been observed in MS patients.<sup>22</sup> Bireley *et al.* demonstrated a relationship between alterations in the urea cycle and neurological disorders.<sup>23</sup> Similarly, Toncev *et al.* observed a decrease in serum uric acid levels in MS patients.<sup>24</sup> EAE has also been shown to be inhibited by urea and by drugs used for treating urea cycle disorder. Specifically, sodium benzoate<sup>25</sup> and sodium phenyl acetate<sup>26</sup> were shown to ameliorate the severity of EAE.

**Taurine** has been reported to have neuromodulation, immunomodulation, and neuroprotective effects.<sup>27</sup> Taurine derivatives, such as acamprostate and taurine chloramine, also can modulate lymphocyte proliferation, cytokine production, leukocyte activation, and dendritic cell function in *in vivo* experiments.<sup>28, 29</sup> Taurine has been shown to increase in the CSF from EAE rats<sup>30</sup>, tissues from EAE mice<sup>31</sup>, and CSF from MS patients.<sup>32</sup> Taurine analogs have been shown to ameliorate the severity of EAE.<sup>33</sup>

**3-hydroxyisobutyric acid** is an intermediate of valine metabolism.<sup>34</sup> Accumulation of 3-hydroxyisobutyric acid in tissues results in a corresponding increase in urinary excretion and is shown to be associated with brain damage and neurodevelopmental problems.<sup>35-37</sup> An *in vitro* study also demonstrated that 3-hydroxyisobutrate inhibits enzymes involved in energy metabolism in the cerebral cortex of young rats.<sup>38</sup>

A mutation in the human *ETHE1* gene (ethylmalonic encephalopathy protein 1) is characterized by lesions in the basal ganglia and brainstem with increased levels of **ethylmalonic acid** in body

fluids.<sup>39</sup> Alternatively, short-chain acyl-CoA dehydrogenase deficiency (SCAD) is also known to increase the amount of ethylmalonic acid in the urine.<sup>40</sup> Among other symptoms, SCAD causes seizures and epilepsy.

**3-ureidopropionate** is a product of pyrimidine degradation. Pyrimidine metabolism abnormalities are reported to be associated with neurological diseases.<sup>41</sup>

**Guanidinoacetate** is an intermediate in the biosynthesis of creatine and has been shown to be associated with neurological disorders due to a deficiency in guanidinoacetate methyltransferase.<sup>42</sup>

**Agmatine** is an intermediate of arginine metabolism.<sup>43</sup> **Creatine** metabolism depends on arginine, where a decrease in creatine contributes to neurological symptoms.<sup>44</sup> Creatine was also shown to be increased in the white matter from patients with relapsing-remitting multiple sclerosis.<sup>45</sup>

**Fructose** has been shown to be increased in CSF samples collected from MS patients with or without inflammatory brain plaques,<sup>46</sup> and from secondary progressive MS patients.<sup>47</sup> Furthermore, there is a close correlation between **glucose** and fructose concentrations in CSF.<sup>48</sup>

**Histamine** and its receptors (H1 to H4) have been implicated in MS pathogenesis and EAE.<sup>49</sup> Histamine regulates a number of physiological processes including inflammation and immune responses.

**Acetylglutamic acid** is a metabolic product of **glutamic acid** (glutamate), where glutamate and its receptors have been implicated in MS/EAE pathogenesis.<sup>50</sup> Glutamate has been shown to be either increased or unchanged in CSF from MS patients, but CSF from EAE rats had decreased levels of glutamate.<sup>30</sup>

### **Supplementary Methods**

**Peptide synthesis.** MOG 35-55 (MEVGWYRSPFSRVVHLYRNGK) and ovalbumin (OVA) 323-339 (ISQAVHAAHAEINEAGR) were synthesized on 9-fluorenylmethyloxy-carbonyl chemistry (Neopeptide, Cambridge, MA) to a purity of more than 90% as verified by HPLC and mass spectroscopy. The peptides were dissolved in 1x phosphate buffered saline, and stored at -20°C until used. The MOG 35-55 peptide was used to induce EAE in mice and the OVA 323-339 was used as a control.

### **Histopathology**

Upon termination, the mice were euthanized and brains and spinal cords were collected in 10% phosphate buffered formalin. Following fixation, brain sections through cerebrum, hippocampus, cerebellum and brain-stem; and spinal cords sections comprised of three sections each from cervical, thoracic, lumbar and sacral regions were made. The tissues were stained by hematoxylin and eosin staining, blinded to treatment and examined histologically by a board certified pathologist and scored for lesion types and severity, and counts were added together. Inflammation was primarily classified as lymphocytic, suppurative, or mixed.<sup>51, 52</sup>

### **T cell proliferation assay**

Lymph nodes (LN) were harvested upon termination of experiment from all the groups of mice used in the study and lymph node cells (LNC) were prepared. The cells were stimulated with MOG 35-55 and OVA 323-339 (control) peptide at a cell density of  $5 \times 10^6$  cells/ml for two days in growth medium containing RPMI medium supplemented with 10% fetal bovine serum, 1 mM sodium pyruvate, 4 mM L-glutamine, 1x each of nonessential amino acids and vitamin mixture and 100 U/ml penicillin–streptomycin (Lonza, Walkersville, MD). Cultures were then pulsed with tritiated  $^3\text{[H]}$  thymidine (1  $\mu\text{Ci/well}$ ; MP Biomedicals, Solon, OH); 16 h later the proliferative responses were measured as counts per minute (cpm) using a Wallac liquid scintillation counter (PerkinElmer, Waltham, MA).<sup>52</sup>

### **Major histocompatibility complex (MHC) class II dextramer staining**

To determine the frequencies of antigen-specific CD4 T cells in EAE vs. EAE-treated groups, we performed MHC class II dextramer staining. Briefly, soluble MHC class II/IA<sup>b</sup> monomers covalently tethered to MOG 35-55 and IA<sup>s</sup> /Theiler's murine encephalomyelitis virus (TMEV) 70-86 (control) were expressed in the baculovirus system and the respective dextramers were derived as described previously.<sup>52, 53</sup> LNC obtained from the EAE and EAE-treated mice were stimulated with MOG 35-55 (20  $\mu\text{g/ml}$ ) for two days in growth medium and the cells were then maintained in growth medium containing IL-2. Viable lymphoblasts harvested on day 6 poststimulation were stained with MOG 35-55 and TMEV 70-86 dextramers followed by staining with anti-CD4 (ebioscience, San Diego, CA) and 7-aminoactinomycin-D (7-AAD; Invitrogen, Carlsbad, CA). After washing, the cells were analyzed by flow cytometry

(FACSCalibur, BD, Biosciences, San Diego, CA) and the percentages of dextramer positive (dext<sup>+</sup>) cells were determined in the live (7-AAD<sup>-</sup>) CD4 population.<sup>53</sup>

**Diet Control.** To evaluate the impact of the supplemental DietGel on urinary metabolites, urine was collected from healthy mice that received either the Teklad global 16% protein rodent diet (n=10) or the Teklad global 16% protein rodent diet supplemented with DietGel (n=10). Twenty 6 to 8-week-old female C57Bl/6 (H-2<sup>b</sup>) mice were obtained from the Jackson Laboratory (Bar Harbor, ME). The mice were randomly classified into four cages and were acclimatized for three days before the start of the experiment. For seven days, the mice received the Teklad global 16% protein rodent diet with or without the supplemental DietGel. Urine samples were collected on the, fifth, sixth and seventh days of the experiment. Urine collections occurred three times daily (10-11 AM; 2-3 PM and 10-11 PM) from each animal by expressing the bladder. The urine samples collected from individual animals were preserved as separate aliquots and stored at -80° C until further analysis. NMR data collection analysis and the follow-up statistical analysis followed the identical protocol described for the EAE induction and treatment experiment.

## Supplementary Table and Figures

**Supplementary Table 1. Histological evaluation of brains and spinal cords**

| Treatment        | Clinical disease |                                |                                 | No. of inflammatory foci <sup>a</sup> |                      |                      |
|------------------|------------------|--------------------------------|---------------------------------|---------------------------------------|----------------------|----------------------|
|                  | Incidence (%)    | Mean day of onset <sup>b</sup> | Mean maximum score <sup>b</sup> | Meninges                              | Parenchyma           | Total                |
| Saline           |                  |                                |                                 | 0                                     | 0                    | 0                    |
| Saline-treated   |                  |                                |                                 | 0                                     | 0                    | 0                    |
| CFA              |                  |                                |                                 | 0                                     | 0                    | 0                    |
| CFA-treated      |                  |                                |                                 | 0                                     | 0                    | 0                    |
| EAE              | 13/13 (100)      | 13.5 ± 0.4                     | 3.5 ± 0.3                       | 6.54 ± 1.26                           | 7.53 ± 1.37          | 14.07 ± 2.47         |
| EAE-treated      | 1/13 (7.69)      |                                |                                 | 0.04 ± 0.04                           | 0.04 ± 0.03          | 0.08 ± 0.06          |
| <i>p</i> -values |                  |                                |                                 | 8.3x10 <sup>-6</sup>                  | 1.8x10 <sup>-5</sup> | 5.2x10 <sup>-6</sup> |

<sup>a</sup> numbers are mean ± SEM. <sup>b</sup> represents only mice that showed clinical disease.

**Scoring scale:** 0, no signs of disease; 1, limp tail or hind limb weakness; 2, limp tail and hind limb weakness; 3, partial paralysis of hind limbs; 4, complete paralysis of hind limbs and 5, moribund or dead.



**a) Proliferative response**

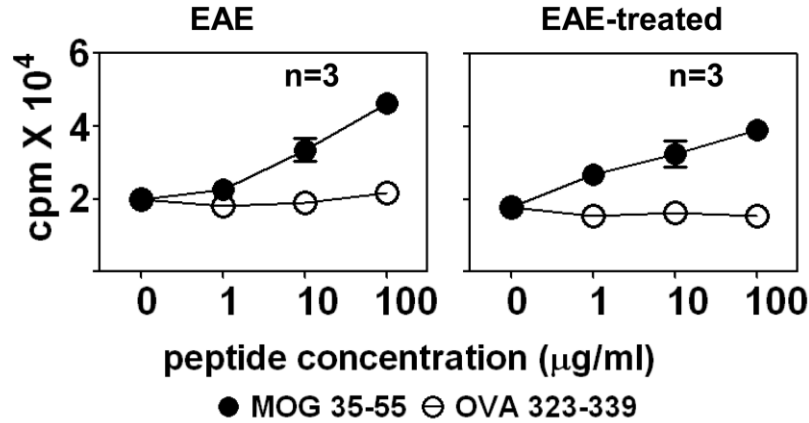

**b) Dextramer staining**

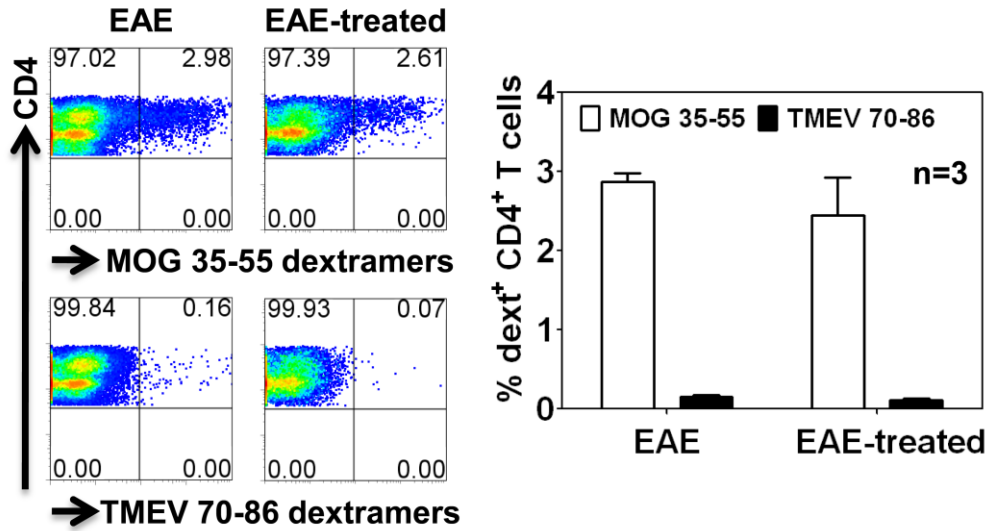

**Supplementary Figure 1. (a) T-cell proliferative response.** Groups of mice were immunized with MOG 35-55 in CFA, and the animals were treated with or without fingolimod daily (1mg/kg body weight) starting day 7 postimmunization until day 30. At termination, LN were harvested to prepare single cell suspensions. LNC were stimulated with MOG 35-55 and OVA 323-339 (control) for two days, and after pulsing with <sup>3</sup>[H] thymidine for 16 hours, proliferative responses were measured as cpm based on thymidine-incorporation. Mean ± SEM values for a

group of mice are shown. **(b) Dextramer staining.** LNC obtained from the above groups were stimulated with MOG 35-55 (20 $\mu$ g/ml) for two days and the cells were maintained in growth medium containing IL-2. On day 6 poststimulation, viable lymphocytes were stained with IA<sup>b</sup>/MOG 35-55 and IA<sup>s</sup>/TMEV 70-86 (control) dextramers, anti-CD4 and 7-AAD. After acquiring the cells by flow cytometry, percentages of dext<sup>+</sup> cells were analyzed in the live (7-AAD<sup>-</sup>) CD4 subset. Left and right panels represent flow cytometric dot plots and mean  $\pm$  SEM values respectively.

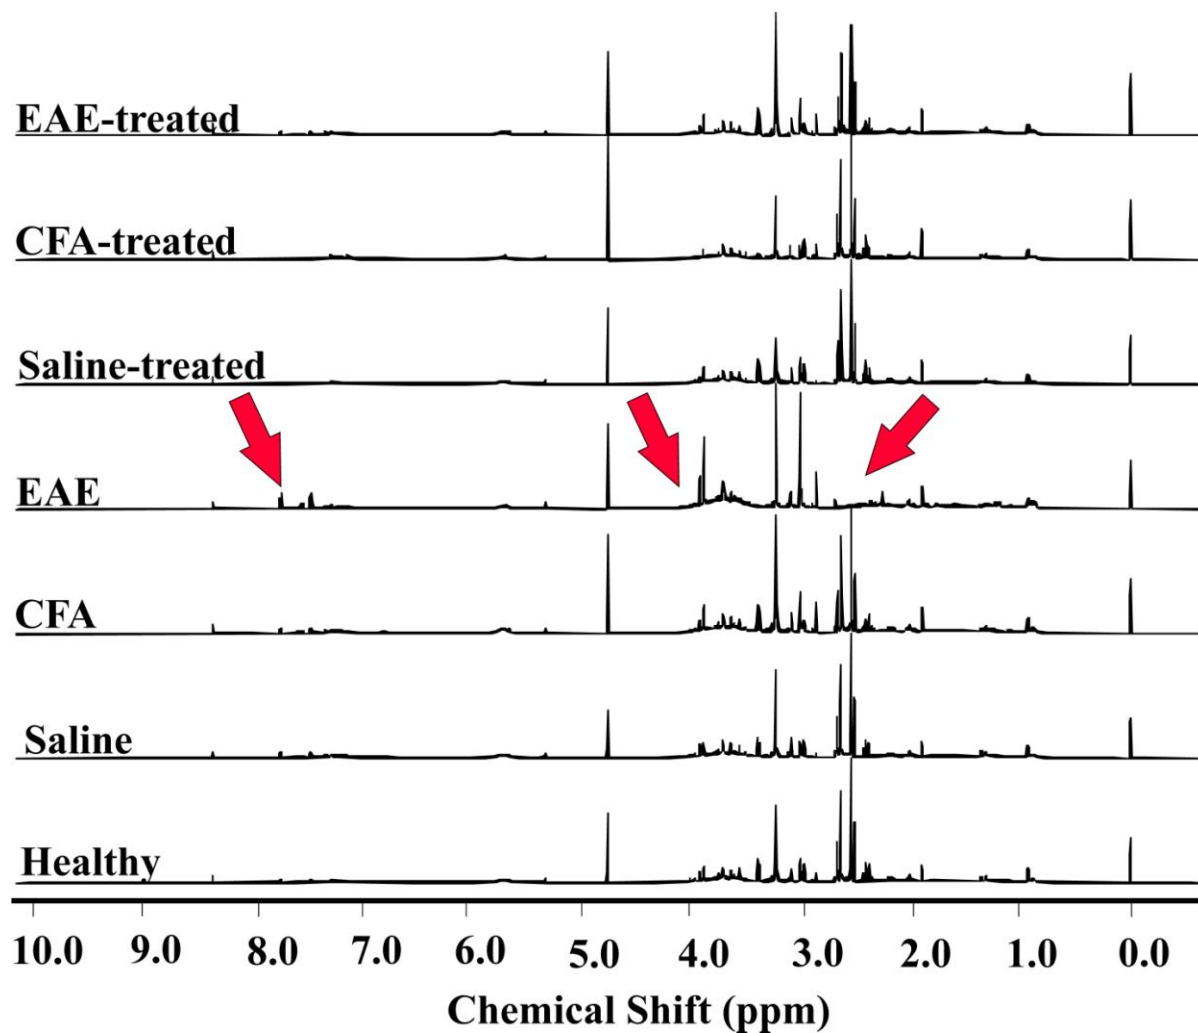

**Supplementary Figure 2.** Representative 1D <sup>1</sup>H NMR spectra of urine samples obtained from healthy, saline, CFA, EAE, saline-treated, CFA-treated and EAE-treated mice. The red arrows indicated regions of the spectra with visible alterations in EAE group in comparison with the other groups.

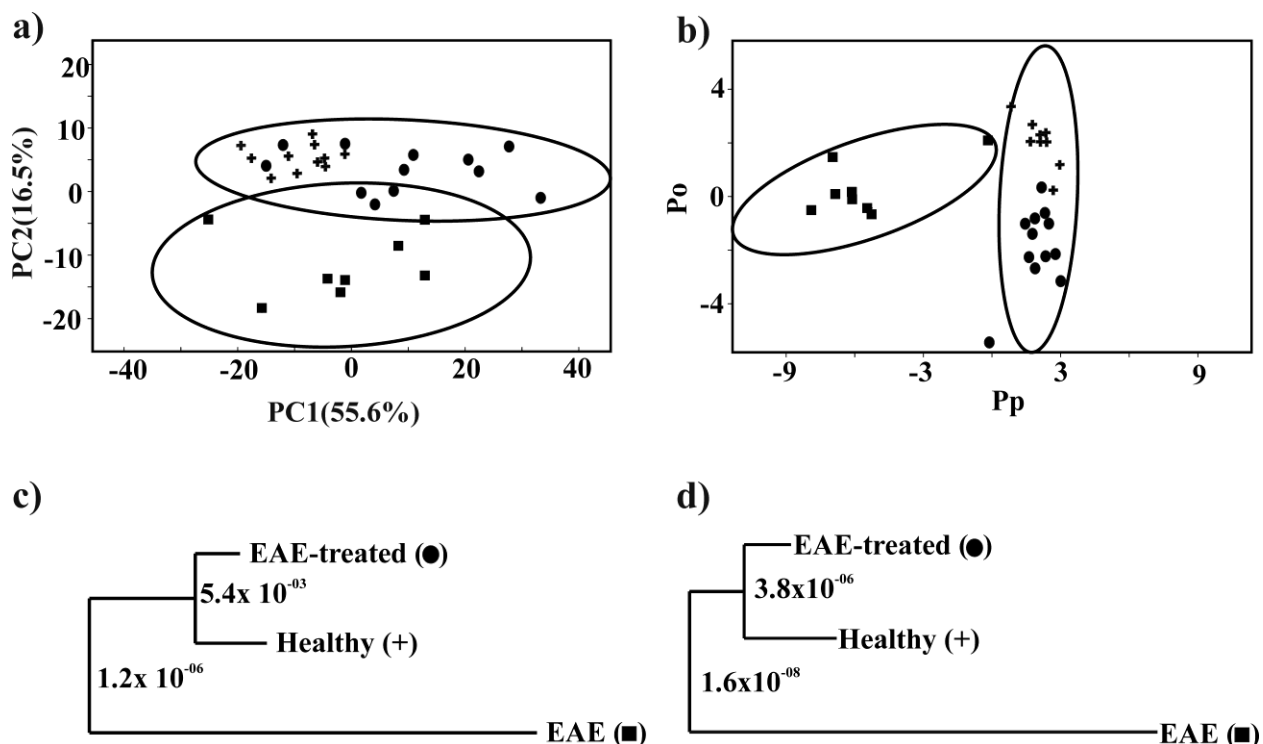

**Supplementary Figure 3.** (a) 2D PCA and (b) 2D OPLS-DA scores plot generated from the 1D  $^1\text{H}$  NMR spectra acquired for the urine samples from day 23. The three classes are healthy (+), EAE (■), and EAE-treated mice (●). The OPLS-DA used one predictive component and one orthogonal component to yield an  $R^2\text{X}$  of 0.761,  $R^2\text{Y}$  of 0.947 and  $Q^2$  of 0.853. The CV-ANOVA validation of the OPLS-DA class distinctions yielded a  $p$ -value of  $3.8 \times 10^{-7}$ . The ellipses correspond to the 95% confidence limits from a normal distribution for each cluster. (c) and (d) Metabolomics tree diagrams determined from the (a) PCA and (b) OPLS-DA scores plot, respectively. The  $p$ -values for each node are indicated on the tree diagram.

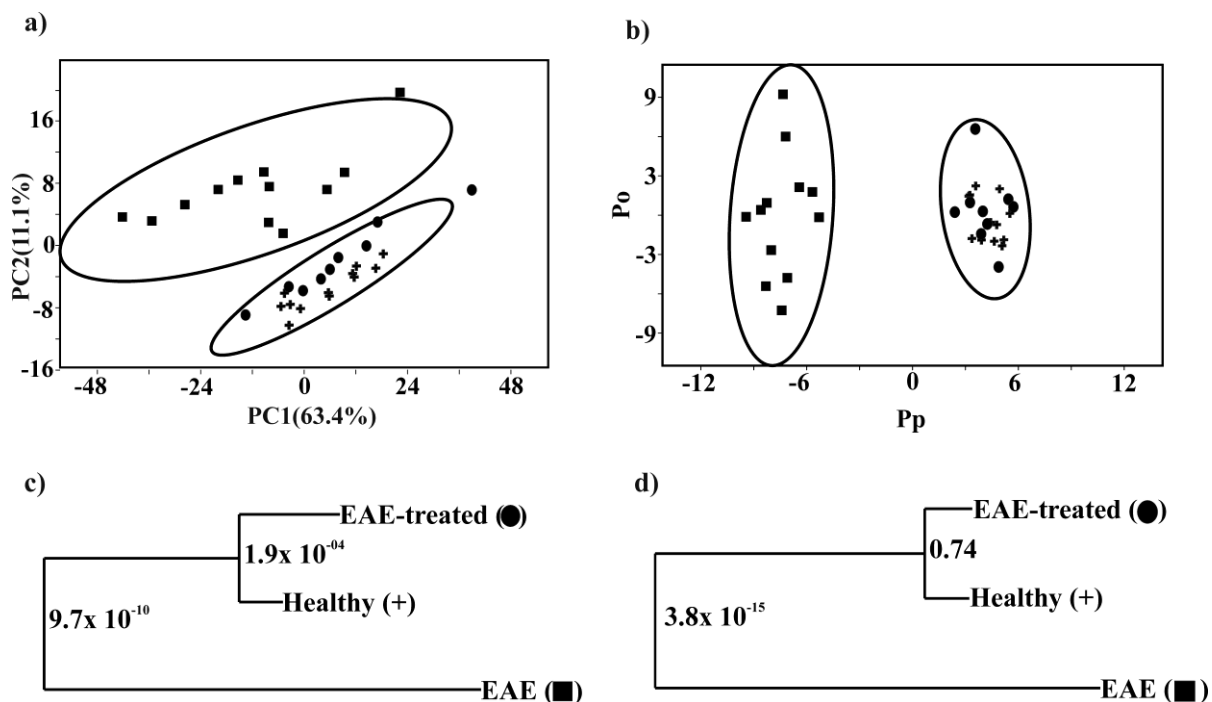

**Supplementary Figure 4.** (a) 2D PCA and (b) 2D OPLS-DA scores plot generated from the 1D  $^1\text{H}$  NMR spectra acquired for the urine samples from day 30. The three classes are healthy (+), EAE (■), and EAE-treated mice (●). The OPLS-DA used one predictive component and one orthogonal component to yield an  $R^2\text{X}$  of 0.76,  $R^2\text{Y}$  of 0.97 and  $Q^2$  of 0.922. The CV-ANOVA validation of the OPLS-DA class distinctions yielded a  $p$ -value of  $3.8 \times 10^{-7}$ . The ellipses correspond to the 95% confidence limits from a normal distribution for each cluster. (c) and (d) Metabolomics tree diagrams determined from the (a) PCA and (b) OPLS-DA scores plot, respectively. The  $p$ -values for each node are indicated on the tree diagram.

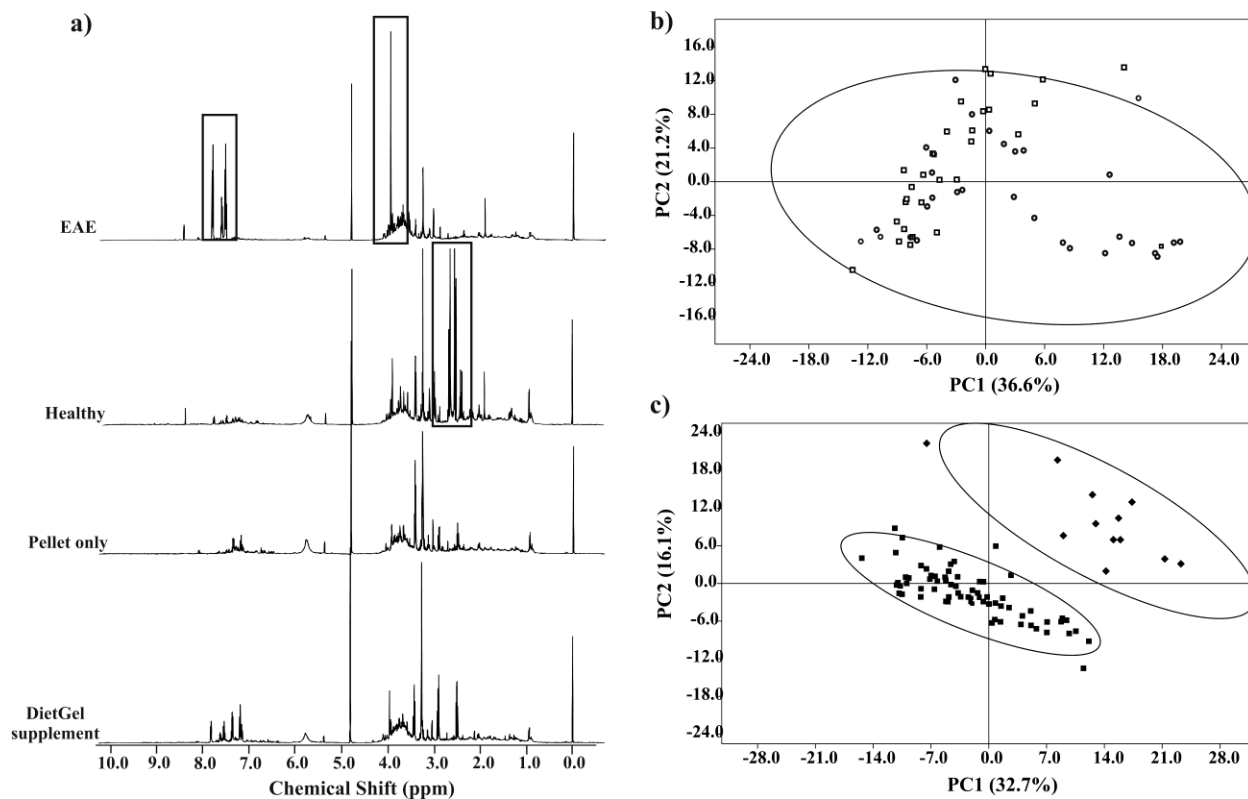

**Supplementary Figure 5.** (a) Calculated median 1D <sup>1</sup>H NMR spectra of urine samples from EAE (n=13) and healthy mice (n=12) on day 17 from the prior EAE induction and treatment experiment (Figure 1b), healthy mice receiving Teklad global 16% protein rodent diet (days 5, 6, and 7, n=28, pellet only), healthy mice receiving the DietGel supplement (days 5, 6, and 7, n=30, DietGel supplement); (b) 2D PCA scores plot generated from the 1D <sup>1</sup>H NMR spectra acquired for the urine samples collected on days 5, 6 and 7 from healthy mice fed with Teklad global 16% protein rodent diet (□), and healthy mice that received the DietGel supplement (○). The ellipse corresponds to the 95% confidence limit from a normal distribution for the DietGel supplement cluster. (c) 2D PCA scores plot for the urine samples collected from the healthy groups representing days 5, 6 and 7 or 17 that received food pellets and/or DietGel (■), and day 17 EAE

mice (◆). The 1D  $^1\text{H}$  NMR data from the prior EAE induction and treatment experiment were normalized to the 1D  $^1\text{H}$  NMR data from the diet control experiment to ensure the two-sets of healthy controls overlapped in the 2D PCA scores plot. The ellipses correspond to the 95% confidence limits from a normal distribution for each cluster.

## Supplemental References

- (1) Bielekova, B., and Martin, R. (2004) Development of biomarkers in multiple sclerosis, *Brain* 127, 1463-1478.
- (2) Lourenco, A. S. T., Baldeiras, I., Graos, M., and Duarte, C. B. (2011) Proteomics-based technologies in the discovery of biomarkers for Multiple Sclerosis in the cerebrospinal fluid, *Curr. Mol. Med.* 11, 326-349.
- (3) Harris, V. K., and Sadiq, S. A. (2009) Disease biomarkers in multiple sclerosis: potential for use in therapeutic decision making, *Mol. Diagn. Ther.* 13, 225-244.
- (4) Ziemann, U., Wahl, M., Hattingen, E., and Tumani, H. (2011) Development of biomarkers for multiple sclerosis as a neurodegenerative disorder, *Prog Neurobiol* 95, 670-685.
- (5) Boylan, M. T., Crockard, A. D., McDonnell, G. V., McMillan, S. A., and Hawkins, S. A. (2001) Serum and cerebrospinal fluid soluble Fas levels in clinical subgroups of multiple sclerosis, *Immunol. Lett.* 78, 183-187.
- (6) Blaber, S. I., Yoon, H., Scarisbrick, I. A., Aparecida, J. M., and Blaber, M. (2007) The Autolytic Regulation of Human Kallikrein-Related Peptidase 6, *Biochemistry* 46, 5209-5217.
- (7) Rejdak, K., Petzold, A., Kocki, T., Kurzepa, J., Grieb, P., Turski, W. A., and Stelmasiak, Z. (2007) Astrocytic activation in relation to inflammatory markers during clinical exacerbation of relapsing-remitting multiple sclerosis, *J. Neural Transm.* 114, 1011-1015.
- (8) Hansson, S. F., Simonsen, A. H., Zetterberg, H., Andersen, O., Haghighi, S., Fagerberg, I., Andreasson, U., Westman-Brinkmalm, A., Wallin, A., Rueetschi, U., and Blennow, K. (2007) Cystatin C in cerebrospinal fluid and multiple sclerosis, *Ann. Neurol.* 62, 193-196.



- (9) Rejdak, K., Petzold, A., Stelmasiak, Z., and Giovannoni, G. (2008) Cerebrospinal fluid brain specific proteins in relation to nitric oxide metabolites during relapse of multiple sclerosis, *Mult. Scler.* 14, 59-66.
- (10) Tumani, H., Lehmsiek, V., Rau, D., Guttman, I., Tauscher, G., Mogel, H., Palm, C., Hirt, V., Suessmuth, S. D., Sapunova-Meier, I., Ludolph, A. C., and Brettschneider, J. (2009) CSF proteome analysis in clinically isolated syndrome (CIS): Candidate markers for conversion to definite multiple sclerosis, *Neurosci. Lett.* 452, 214-217.
- (11) Liu, S., Bai, S., Qin, Z., Yang, Y., Cui, Y., and Qin, Y. (2009) Quantitative proteomic analysis of the cerebrospinal fluid of patients with multiple sclerosis, *J. Cell. Mol. Med.* 13, 1586-1603.
- (12) Ottervald, J., Franzen, B., Nilsson, K., Andersson, L. I., Khademi, M., Eriksson, B., Kjellstroem, S., Marko-Varga, G., Vegvari, A., Harris, R. A., Laurell, T., Miliotis, T., Matusевичius, D., Salter, H., Ferm, M., and Olsson, T. (2010) Multiple sclerosis: Identification and clinical evaluation of novel CSF biomarkers, *J. Proteomics* 73, 1117-1132.
- (13) Brettschneider, J., Czerwoniak, A., Senel, M., Fang, L., Kassubek, J., Pinkhardt, E., Lauda, F., Kapfer, T., Jesse, S., Lehmsiek, V., Ludolph, A. C., Otto, M., and Tumani, H. (2010) The chemokine CXCL13 is a prognostic marker in clinically isolated syndrome (CIS), *PLoS One* 5, e11986.
- (14) Harris, V. K., Diamanduros, A., Good, P., Zakin, E., Chalivendra, V., and Sadiq, S. A. (2010) Bri2-23 is a potential cerebrospinal fluid biomarker in multiple sclerosis, *Neurobiol. Dis.* 40, 331-339.

- (15) Dujmovic, I. (2011) Cerebrospinal fluid and blood biomarkers of neuroaxonal damage in multiple sclerosis, *Mult. Scler. Int.*, 767083, 767018 pp.
- (16) Peskind, E. R., Riekse, R., Quinn, J. F., Kaye, J., Clark, C. M., Farlow, M. R., Decarli, C., Chabal, C., Vavrek, D., Raskind, M. A., and Galasko, D. (2005) Safety and acceptability of the research lumbar puncture, *Alzheimer Dis Assoc Disord* 19, 220-225.
- (17) Peskind, E., Nordberg, A., Darreh-Shori, T., and Soininen, H. (2009) Safety of lumbar puncture procedures in patients with Alzheimer's disease, *Curr. Alzheimer Res.* 6, 290-292.
- (18) Cao, L., Kirk, M. C., Coward, L. U., Jackson, P., and Whitaker, J. N. (2000) p-Cresol sulfate is the dominant component of urinary myelin basic protein-like material, *Arch. Biochem. Biophys.* 377, 9-21.
- (19) Khorami, H., Neyestani, T. R., Kadkhodae, M., and Lotfi, J. (2003) Increased urinary neopterin: creatinine ratio as a marker of activation of cell-mediated immunity and oxidative stress in the Iranian patients with multiple sclerosis, *Iran. J. Allergy, Asthma Immunol.* 2, 155-158.
- (20) Rejdak, K., Leary, S. M., Petzold, A., Thompson, A. J., Miller, D. H., and Giovannoni, G. (2010) Urinary neopterin and nitric oxide metabolites as markers of interferon  $\beta$ -1 activity in primary progressive multiple sclerosis, *Mult. Scler.* 16, 1066-1072.
- (21) Peterson, L. K., Masaki, T., Wheelwright, S. R., Tsunoda, I., and Fujinami, R. S. (2008) Cross-reactive myelin antibody induces renal pathology, *Autoimmunity* 41, 526-536.
- (22) Calabresi, P. A., Austin, H., Racke, M. K., Goodman, A., Choyke, P., Maloni, H., and McFarland, H. F. (2002) Impaired renal function in progressive multiple sclerosis, *Neurology* 59, 1799-1801.

- (23) Bireley, W. R., Van Hove, J. L., Gallagher, R. C., and Fenton, L. Z. (2011) Urea cycle disorders: brain MRI and neurological outcome, *Pediatr Radiol*.
- (24) G. Toncev, B. M., S. Toncev and G. Samardzic. (2002) Serum uric acid levels in multiple sclerosis patients correlate with activity of disease and blood–brain barrier dysfunction, *European Journal of Neurology* 9, 221-226.
- (25) Pahan, S. B. a. K. (2007) Sodium Benzoate, a Food Additive and a Metabolite of Cinnamon, Modifies T Cells at Multiple Steps and Inhibits Adoptive Transfer of Experimental Allergic Encephalomyelitis, *J Immunol* 179, 275-283.
- (26) Dasgupta S, Z. Y., Jana M, Banik NL, and Pahan K. (2003) Sodium phenylacetate inhibits adoptive transfer of experimental allergic encephalomyelitis in SJL/J mice at multiple steps., *J Immunol*. 170, 3874-3882.
- (27) Sternberg, Z., Cesario, A., Rittenhouse-Olson, K., Sobel, R. A., Leung, Y. K., Pankewycz, O., Zhu, B., Whitcomb, T., Sternberg, D. S., and Munschauer, F. E. (2012) Acamprosate modulates experimental autoimmune encephalomyelitis, *Inflammopharmacology* 20, 39-48.
- (28) Park, E., Jia, J., Quinn, M. R., and Schuller-Levis, G. (2002) Taurine chloramine inhibits lymphocyte proliferation and decreases cytokine production in activated human leukocytes, *Clin Immunol* 102, 179-184.
- (29) Marcinkiewicz, J., Nowak, B., Grabowska, A., Bobek, M., Petrovska, L., and Chain, B. (1999) Regulation of murine dendritic cell functions in vitro by taurine chloramine, a major product of the neutrophil myeloperoxidase-halide system, *Immunology* 98, 371-378.

- (30) Noga, M. J., Dane, A., Shi, S., Attali, A., van, A. H., Suidgeest, E., Tuinstra, T., Muilwijk, B., Coulier, L., Luider, T., Reijmers, T. H., Vreeken, R. J., and Hankemeier, T. (2012) Metabolomics of cerebrospinal fluid reveals changes in the central nervous system metabolism in a rat model of multiple sclerosis, *Metabolomics* 8, 253-263.
- (31) Musgrave, T., Tenorio, G., Rauw, G., Baker, G. B., and Kerr, B. J. (2011) Tissue concentration changes of amino acids and biogenic amines in the central nervous system of mice with experimental autoimmune encephalomyelitis (EAE), *Neurochem. Int.* 59, 28-38.
- (32) Garseth, M., White, L. R., and Aasly, J. (2001) Little change in cerebrospinal fluid amino acids in subtypes of multiple sclerosis compared with acute polyradiculoneuropathy, *Neurochem. Int.* 39, 111-115.
- (33) Sternberg, Z., Cesario, A., Rittenhouse-Olson, K., Sobel, R. A., Pankewycz, O., Zhu, B., Whitcomb, T., Sternberg, D. S., and Munschauer, F. E. (2012) Acamprosate modulates experimental autoimmune encephalomyelitis, *Inflammopharmacology* 20, 39-48.
- (34) Letto, J., Brosnan, M. E., and Brosnan, J. T. (1986) Valine metabolism. Gluconeogenesis from 3-hydroxyisobutyrate, *Biochem J* 240, 909-912.
- (35) Sasaki, M., Iwata, H., Sugai, K., Fukumizu, M., Kimura, M., and Yamaguchi, S. (2001) A severely brain-damaged case of 3-hydroxyisobutyric aciduria, *Brain Dev* 23, 243-245.
- (36) Sasaki, M., Yamada, N., Fukumizu, M., and Sugai, K. (2006) Basal ganglia lesions in a patient with 3-hydroxyisobutyric aciduria, *Brain Dev* 28, 600-603.
- (37) Loupatty, F. J., van, d. S. A., Ijlst, L., Ruiten, J. P. N., Ofman, R., Baumgartner, M. R., Ballhausen, D., Yamaguchi, S., Duran, M., and Wanders, R. J. A. (2006) Clinical,

- biochemical, and molecular findings in three patients with 3-hydroxyisobutyric aciduria, *Mol. Genet. Metab.* 87, 243-248.
- (38) Viegas, C. M., da Costa Ferreira, G., Schuck, P. F., Tonin, A. M., Zanatta, A., de Souza Wyse, A. T., Dutra-Filho, C. S., Wannmacher, C. M., and Wajner, M. (2008) Evidence that 3-hydroxyisobutyric acid inhibits key enzymes of energy metabolism in cerebral cortex of young rats, *Int J Dev Neurosci* 26, 293-299.
- (39) Tiranti, V., Briem, E., Lamantea, E., Mineri, R., Papaleo, E., De Gioia, L., Forlani, F., Rinaldo, P., Dickson, P., Abu-Libdeh, B., Cindro-Heberle, L., Owaidha, M., Jack, R. M., Christensen, E., Burlina, A., and Zeviani, M. (2006) ETHE1 mutations are specific to ethylmalonic encephalopathy, *J Med Genet* 43, 340-346.
- (40) van Maldegem, B. T., Wanders, R. J., and Wijburg, F. A. (2010) Clinical aspects of short-chain acyl-CoA dehydrogenase deficiency, *J Inherit Metab Dis* 33, 507-511.
- (41) Kolker, S., Okun, J. G., Horster, F., Assmann, B., Ahlemeyer, B., Kohlmuller, D., Exner-Camps, S., Mayatepek, E., Krieglstein, J., and Hoffmann, G. F. (2001) 3-Ureidopropionate contributes to the neuropathology of 3-ureidopropionase deficiency and severe propionic aciduria: a hypothesis, *J Neurosci Res* 66, 666-673.
- (42) Gordon, N. (2010) Guanidinoacetate methyltransferase deficiency (GAMT), *Brain Dev* 32, 79-81.
- (43) Cabella, C., Gardini, G., Corpillo, D., Testore, G., Bedino, S., Solinas, S. P., Cravanzola, C., Vargiu, C., Grillo, M. A., and Colombatto, S. (2001) Transport and metabolism of agmatine in rat hepatocyte cultures, *Eur J Biochem* 268, 940-947.

- (44) Boenzi, S., Pastore, A., Martinelli, D., Goffredo, B. M., Boiani, A., Rizzo, C., and Dionisi-Vici, C. (2012) Creatine metabolism in urea cycle defects, *J. Inherited Metab. Dis.* 35, 647-653.
- (45) Inglese, M., Li, B. S. Y., Rusinek, H., Babb, J. S., Grossman, R. I., and Gonen, O. (2003) Diffusely elevated cerebral choline and creatine in relapsing-remitting multiple sclerosis, *Magn. Reson. Med.* 50, 190-195.
- (46) Lutz, N. W., Viola, A., Malikova, I., Confort-Gouny, S., Audoin, B., Ranjeva, J.-P., Pelletier, J., and Cozzone, P. J. (2007) Inflammatory multiple-sclerosis plaques generate characteristic metabolic profiles in cerebrospinal fluid, *PLoS One* 2, e595.
- (47) Regenold, W. T., Phatak, P., Makley, M. J., Stone, R. D., and Kling, M. A. (2008) Cerebrospinal fluid evidence of increased extra-mitochondrial glucose metabolism implicates mitochondrial dysfunction in multiple sclerosis disease progression, *J. Neurol. Sci.* 275, 106-112.
- (48) Wray, H. L., and Winegrad, A. I. (1966) Free fructose in human cerebrospinal fluid, *Diabetologia* 2, 82-85.
- (49) Jadidi-Niaragh, F., and Mirshafiey, A. (2010) Histamine and histamine receptors in pathogenesis and treatment of multiple sclerosis, *Neuropharmacology* 59, 180-189.
- (50) Frigo, M., Cogo, M. G., Fusco, M. L., Gardinetti, M., and Frigeni, B. (2012) Glutamate and multiple sclerosis, *Curr. Med. Chem.* 19, 1295-1299.
- (51) Mendel, I., Kerlero de Rosbo, N., and Ben-Nun, A. (1995) A myelin oligodendrocyte glycoprotein peptide induces typical chronic experimental autoimmune encephalomyelitis in H-2b mice: fine specificity and T cell receptor V beta expression of encephalitogenic T cells, *Eur J Immunol* 25, 1951-1959.

- (52) Massilamany, C., Thulasingham, S., Steffen, D., and Reddy, J. (2011) Gender differences in CNS autoimmunity induced by mimicry epitope for PLP 139-151 in SJL mice, *J Neuroimmunol* 230, 95-104.
- (53) Massilamany, C., Upadhyaya, B., Gangaplara, A., Kuszynski, C., and Reddy, J. (2011) Detection of autoreactive CD4 T cells using major histocompatibility complex class II dextramers, *BMC Immunol* 12, 40.
